# Supplementary material for: Effect of miR-146 targeted HDMCP up-regulation in the pathogenesis of nonalcoholic steatohepatitis
Source: PubMed Central journal article supplement (PMC5367781; doi:10.1371/journal.pone.0174218), 2017-03-27
Supplement: pone.0174218.s001.pdf [file pone.0174218.s001.pdf]

**Title:** Effect of miR-146 targeted HDMCP up-regulation in the pathogenesis of nonalcoholic steatohepatitis

<sup>1</sup>Xi Jin\*, <sup>2</sup>Juan-wen Zhang#, <sup>1</sup>Yi-peng Chen, <sup>1</sup>Zun Xiang, <sup>1</sup>Jie-xia Ding, <sup>1</sup>You-ming Li

<sup>1</sup>, Department of Gastroenterology, The First Affiliated Hospital, College of Medicine, Zhejiang University

<sup>2</sup>,Department of Clinical Laboratory, The First Affiliated Hospital, College of Medicine, Zhejiang University

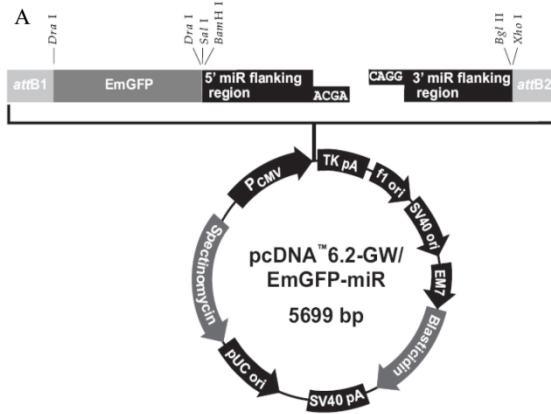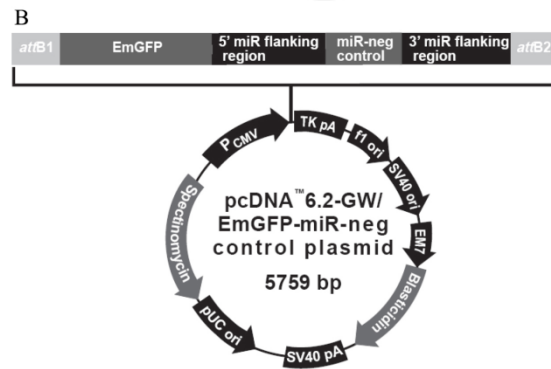

**C**

|                 |                                                                            |
|-----------------|----------------------------------------------------------------------------|
| SLC25A47-F1-miR | 5'- TGCTGAGTGCCAGATGCCTGTGTACTGTTTTGGCCACTGACTGACAGTACACACATCTGGCACT -3'   |
| SLC25A47-R1-miR | 5'- CCTGAGTGCCAGATGTGTACTGTGACAGTCAGTGGCCAAAACAGTACACAGGCATCTGGCACTC -3'   |
| SLC25A47-F2-miR | 5'- TGCTGAGACACGGGAAGATACACAGGGAGTTTTGGCCACTGACTGACTCCCTGGTCTCCGTGTCT -3'  |
| SLC25A47-R2-miR | 5'- CCTGAGACACGGGAAGACACAGGGAGTCAGTCAGTGGCCAAAACCTCCCTGGTATCTCCGTGTCTC -3' |
| SLC25A47-F3-miR | 5'- TGCTGAACGCTGGTCAATACAGTGGTCAGTCAGTGGCCAAAACCTGTATGGTGACCAGCGTTC -3'    |
| SLC25A47-R3-miR | 5'- CCTGAACGCTGGTCAATACAGTGGTCAGTCAGTGGCCAAAACCTGTATGGTGACCAGCGTTC -3'     |
| SLC25A47-F4-miR | 5'- TGCTGAAGACACCATGTTGACAGGGTTTTGGCCACTGACTGACCCCTGTCAATGGTGGTCTTC -3'    |
| SLC25A47-R4-miR | 5'- CCTGAAGACACCATTGACAGGGGTGAGTCAGTGGCCAAAACCTGTCAATGGTGGTCTTC -3'        |

**D**

```

ATGGATTTTGCCTGGAGCCATCGGAGCGTCTGCGGTGTGCTGTGGGTACCCCTGGACACGG
TGAAGGTCAGGATCCAGACGGAGCCAAAGTACAGGCATCTGGCACTGCGTCCGGGATACGTATC
ACCGAGAGCGCGTGTGGGGCTTCTACCGGGGCTCTCCTGCTGCCGTGTGCACGGTGCCCTGGTATG
TCCTGGTCTGTTTGGCACTACCGCACTGCTGGCGCACATCTGCCGCTCCGGTACGGCAACCTGA
CGCCAAGCCACCAAGGCCACATACGCTCTCGGGATGCGCTCCGGCTCCTCCGCTGTCTCTTG
ACGTCGCCCACTGAGGTGGCCAAAGTCCGCTTGACAGACGACAGACAGGGCCAGAAGCAGCAGCGG
CGGCTTTCGGCTCGGGGCGTGGCTGTGCCCCATGTGTCTGTGCCCCAGCCTGCCAGAGCC
CAAGTACCAGCGGGCCACTGCACTGCTGGCCACGGTACGCCGTGAGGAGGGGCTGTGCGGCTCTAC
AAGGGCAGCTCGGCCCTGGTCTTACGGGACGGCCACTCCTTTGCCACTACTCTTCTACGGCGT
CCTCTGCAGTGGCTCAGCCCCGCTGGCCACAGCGCGCCAGATGCCCGGGGCTGCTGGTGGCCGGG
GGCTGTGACAGGAGTCTGGCTGGGCTGTGGCCACCCCATGGACGTGATCAAGTCGAGACTCGAGG
CAGACGGGACAGGGCCAGAGGCCCTACCGGGGTCTCTCTGTTTATGGTATGAGCCCGCAGAGG
AGGGACCCCGGGTCTTTTCAAGGGGTGGTACTCAATTGCTGCCCGGCTTTCCTGTCACATGGTGG
GTCTCGTGCCTATGAGCAGTGTGAGGCTCGCCGGGGTCTGCTACATAG

```

**Supplementary Figure 1, Graphics of plasmids and miRNA sequences for RNA interference.** (A), schematic representation of pcDNA<sup>TM</sup>6.2-GW/EmGFP-miR expression plasmid; (B), schematic representation of pcDNA<sup>TM</sup>6.2-GW/EmGFP-miR-neg control expression plasmid; (C), four sequences of inserted miRNAs to antagonize HDMCP expression, where the underlined third sequence was finally selected; (D), four binding sites for miRNA sequence 1-4 was sequentially marked as yellow, red, blue and green in HDMCP.

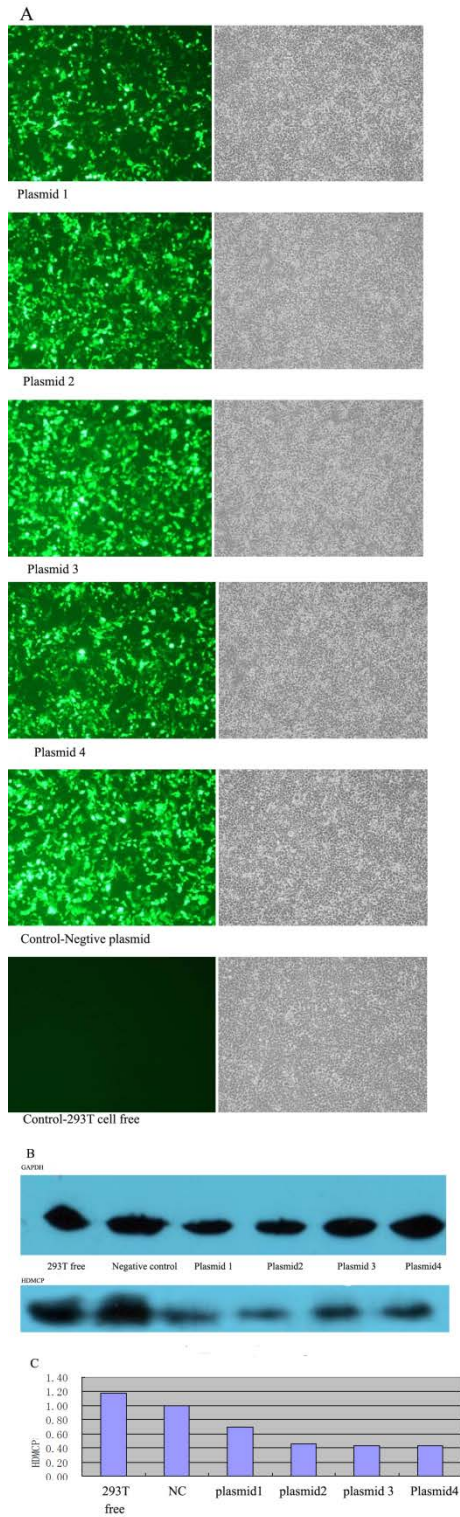

**Supplementary Figure 2, Plasmid selection for in-vitro and in-vivo study. (A),** fluorescence photo of 293T cell transfected with different reagents; (B), HDMCP expression after RNA interference shown by western blot.
